# Supplementary figures and images for: Human Expression QTLs Are Enriched in Signals of Environmental Adaptation
Source: PubMed Central journal article supplement — Genome Biol Evol. 2013 Aug 19;5(9):1689–701. doi: 10.1093/gbe/evt124 (PMC3787676; doi:10.1093/gbe/evt124), 2013-08-19

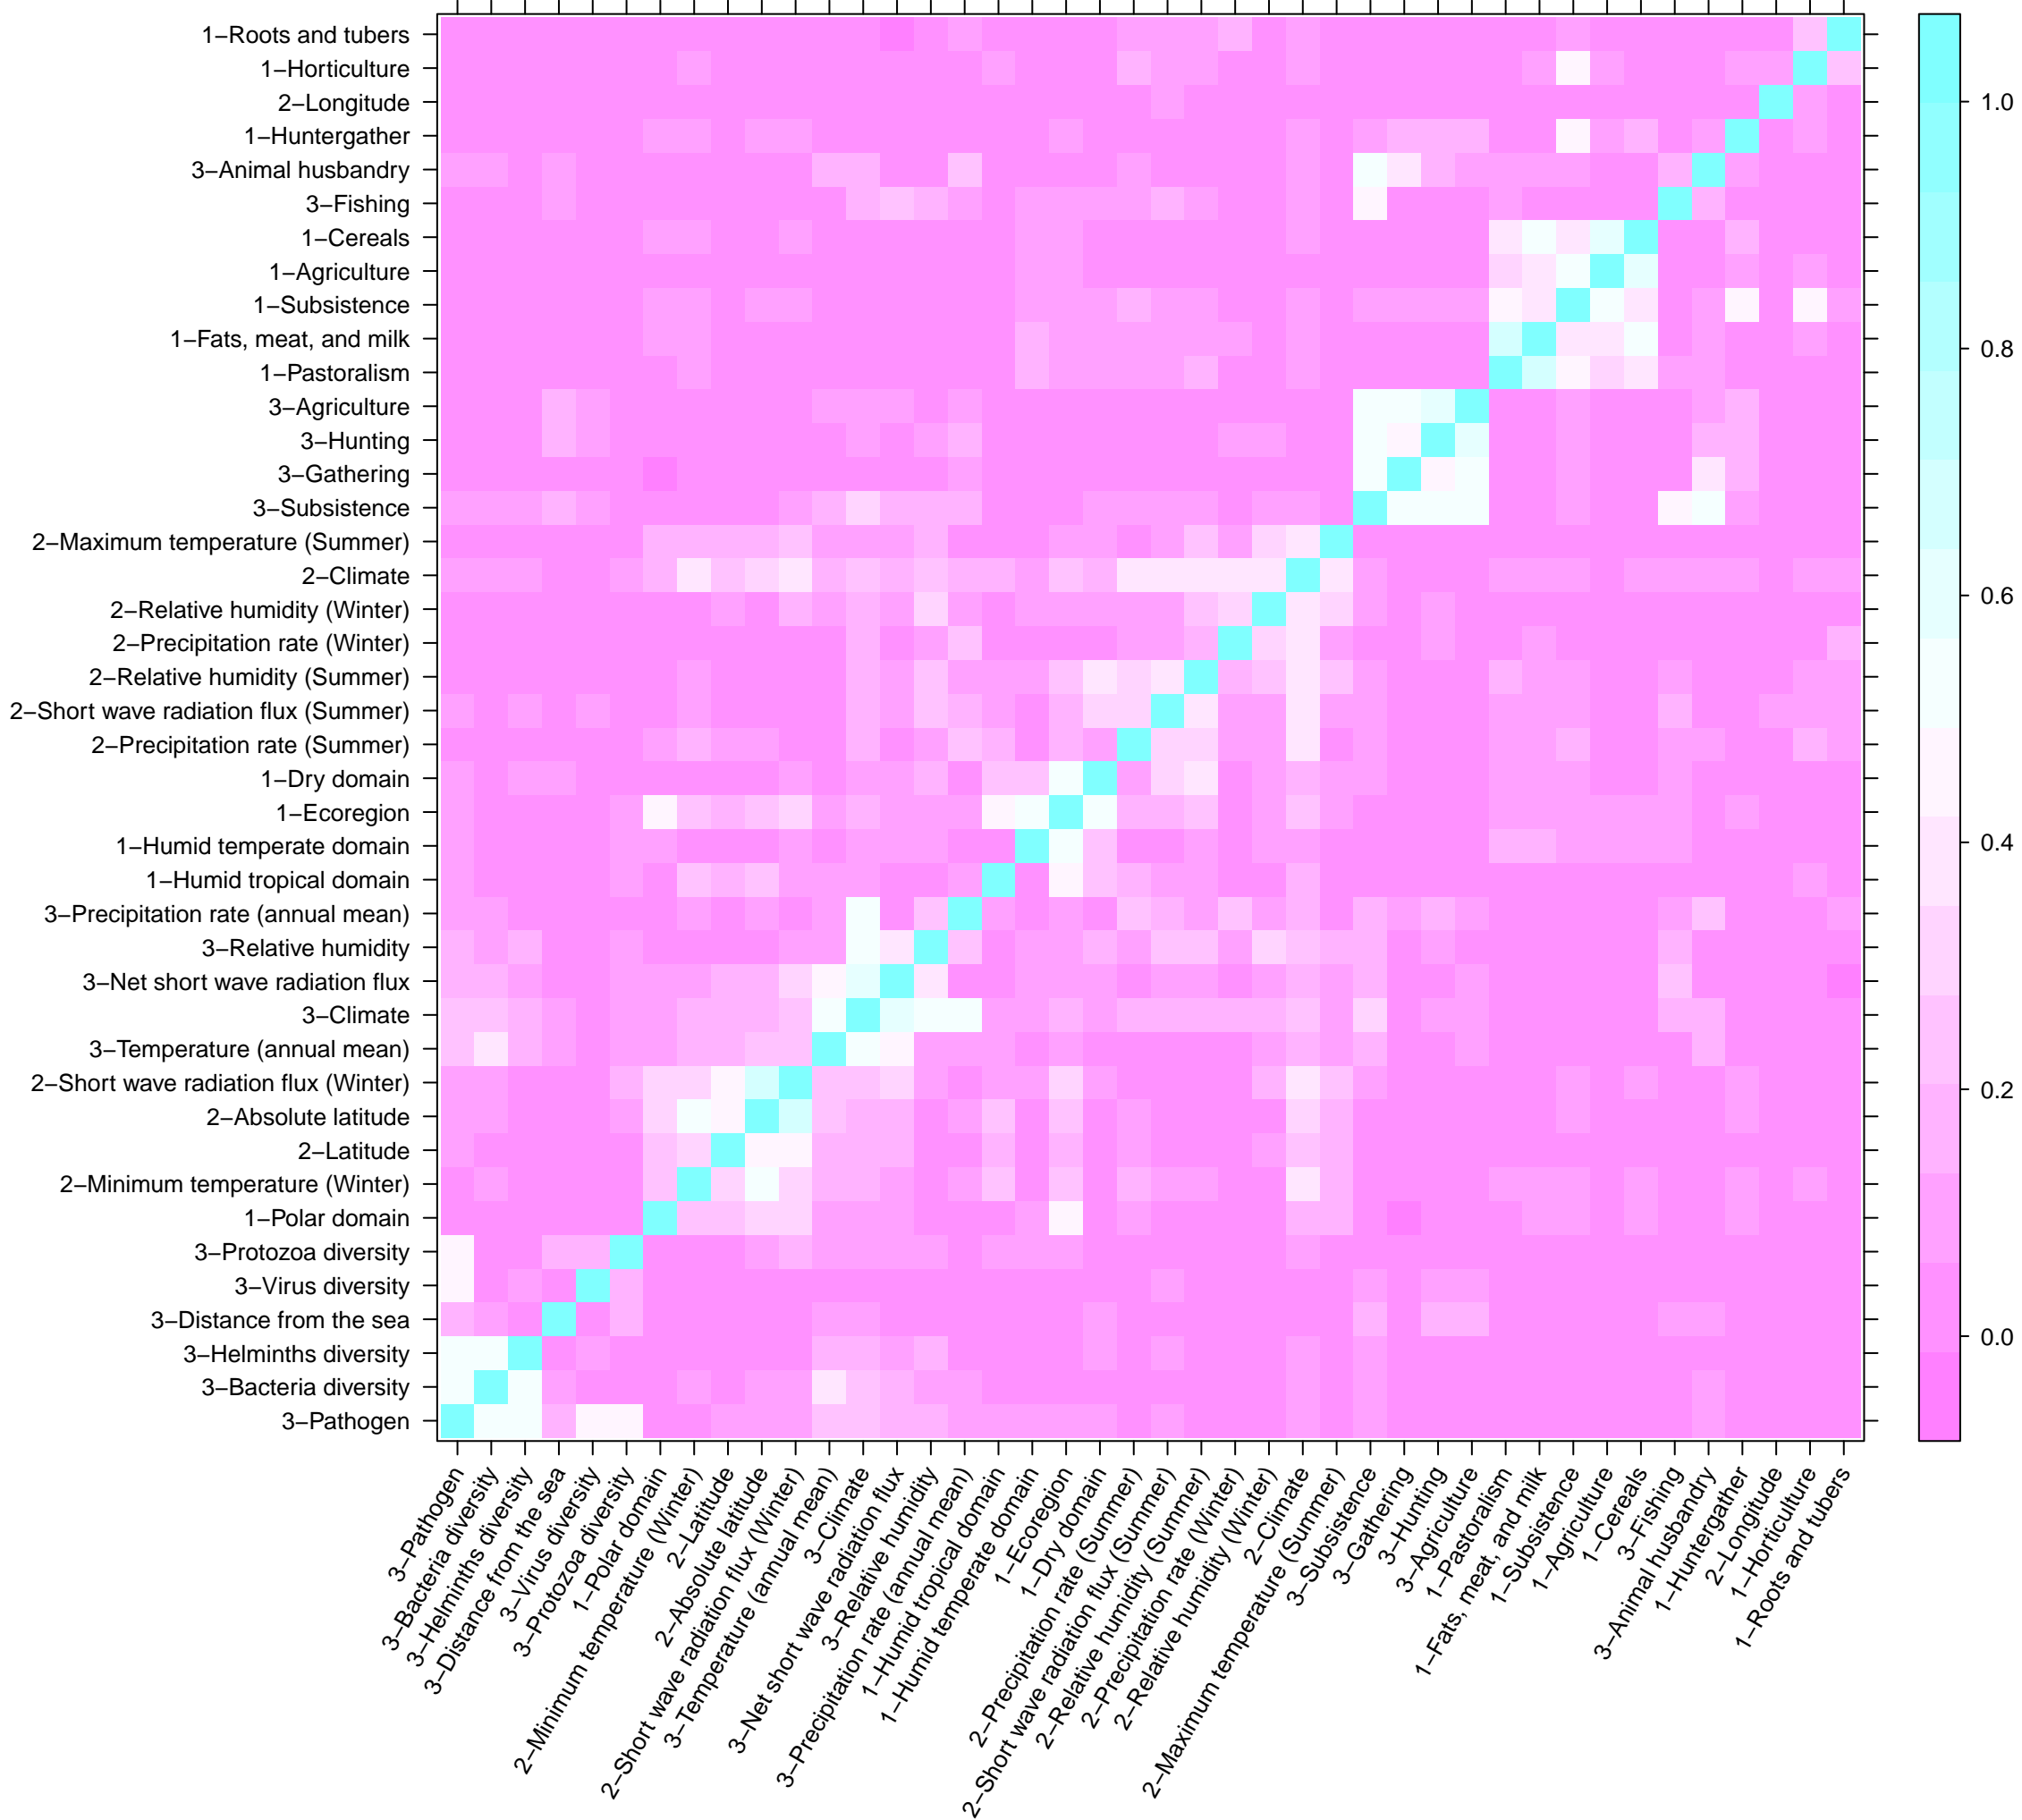

Supplement: supp_evt124_Figure_S1.pdf [file supp_evt124_Figure_S1.pdf]
